# Supplementary material for: Investigating the Effect of the Interaction of Maize Inducer and Donor Backgrounds on Haploid Induction Rates
Source: MDPI journal article supplement (doi:10.3390/plants11121527), 2022-06-07
Supplement: s1 [file s1]

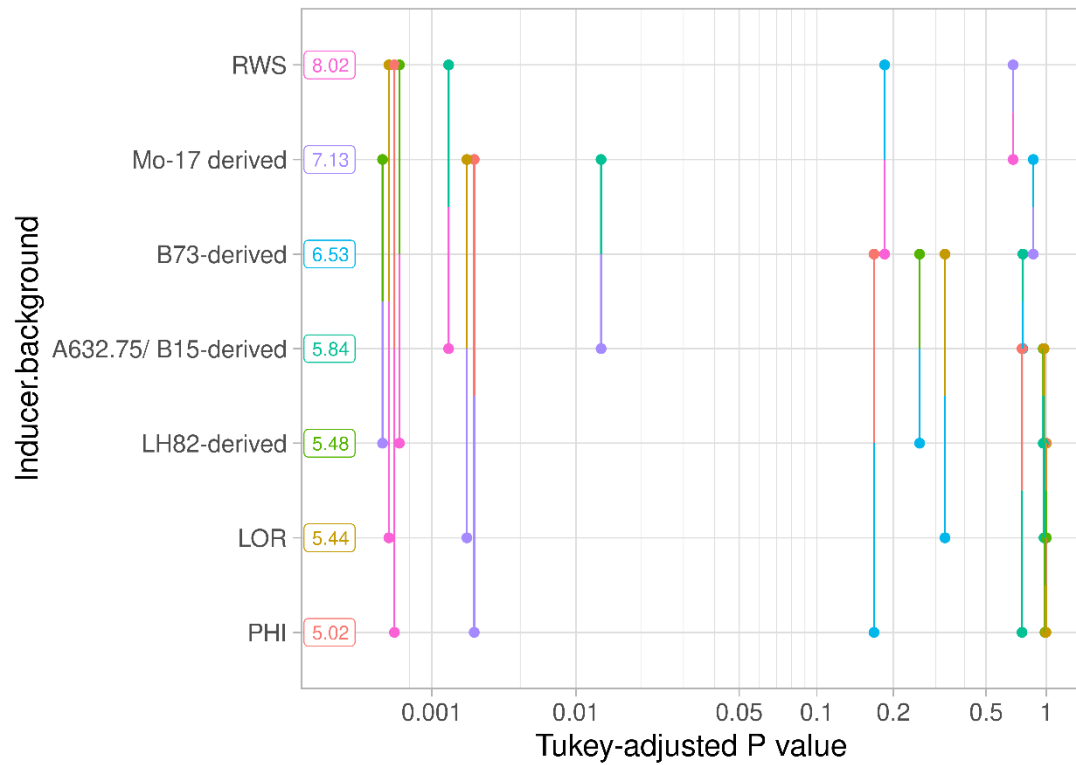

**Figure S1.** The pairwise p-value plot for Haploid Induction Rate.

**Table S1.** Pairwise comparison matrix for HIR.

| Inducer back-ground | A632.75/<br>B15-de-<br>rived | B73-de-<br>rived | LH82-de-<br>rived | LOR     | Mo-17<br>derived | PHI     | RWS    |
|---------------------|------------------------------|------------------|-------------------|---------|------------------|---------|--------|
| A632.75/B15-derived | [5.84]                       | 0.7528           | 0.9642            | 0.9694  | 0.0132           | 0.7505  | 0.0015 |
| B73-derived         | -0.6910                      | [6.53]           | 0.2557            | 0.3278  | 0.8522           | 0.1674  | 0.1844 |
| LH82-derived        | 0.3638                       | 1.0548           | [5.48]            | 1.0000  | 0.0003           | 0.9815  | <.0001 |
| LOR                 | 0.4050                       | 1.0959           | 0.0411            | [5.41]  | 0.0021           | 0.9923  | 0.0002 |
| Mo17-derived        | -1.2927                      | -0.6018          | -1.6566           | -1.6977 | [7.13]           | 0.0025  | 0.6767 |
| PHI                 | 0.8220                       | 1.5130           | 0.4582            | 0.4171  | 2.1148           | [5.02]  | 0.0002 |
| RWS                 | -2.1780                      | -1.4870          | -2.5418           | -2.5829 | -0.8852          | -3.0000 | [8.02] |

The diagonals show the marginal means, lower triangle shows the pairwise difference estimates and the upper triangle shows the Tukey-adjusted p-values of the pairwise comparisons.

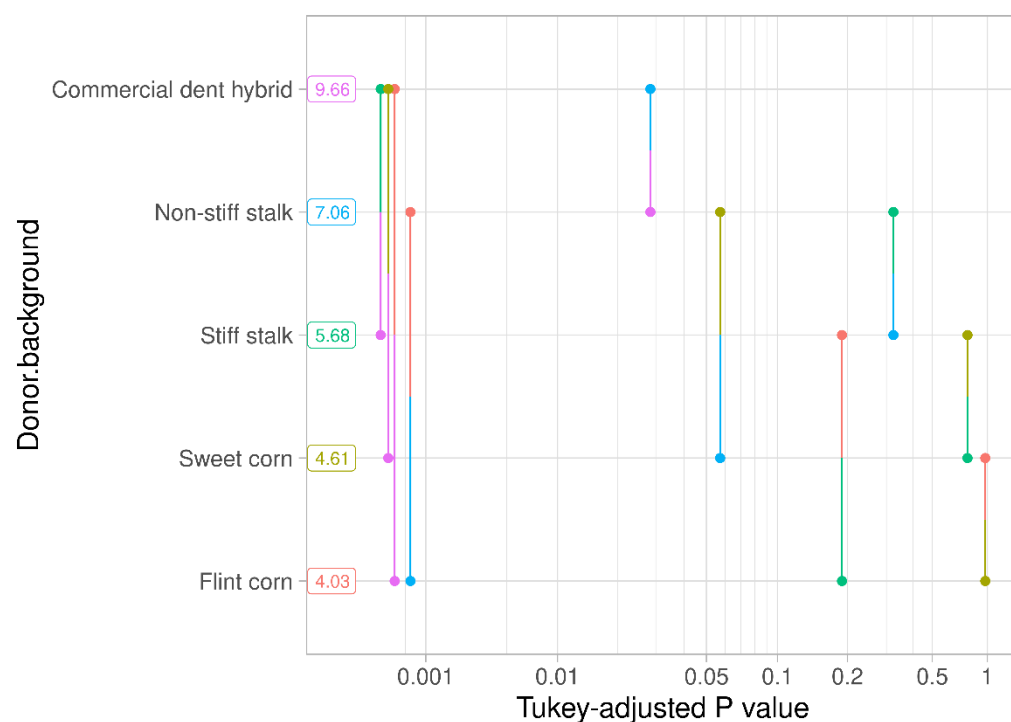

**Figure S2.** The pairwise p-value plot for inducibility of donors belonging to different genetic backgrounds.

**Table S2.** The estimated marginal means (*lsmeans*) of performance of inducer backgrounds on specific donor backgrounds.

| ## | Inducer background   | Donor back-ground      | emmean | SE    | asympt.LCL | asympt.UCL |
|----|----------------------|------------------------|--------|-------|------------|------------|
| 1  | A632.75/ B15-derived | Commercial dent hybrid | 9.28   | 1.055 | 7.2134     | 11.35      |
| 2  | B73-derived          |                        | 11.38  | 1.113 | 9.1979     | 13.56      |
| 3  | LH82-derived         |                        | 8.34   | 1.055 | 6.2666     | 10.40      |
| 4  | LOR                  |                        | 9.92   | 1.142 | 7.6807     | 12.16      |
| 5  | Mo17-derived         |                        | 10.10  | 1.058 | 8.0228     | 12.17      |
| 6  | PHI                  |                        | 6.92   | 1.360 | 4.2576     | 9.59       |
| 7  | RWS                  |                        | 11.71  | 1.336 | 9.0912     | 14.33      |
| 8  | A632.75/ B15-derived | Non-Stiff stalk        | 7.23   | 0.856 | 5.5535     | 8.91       |
| 9  | B73-derived          |                        | 7.85   | 0.920 | 6.0436     | 9.65       |
| 10 | LH82-derived         |                        | 6.31   | 0.853 | 4.6320     | 7.98       |
| 11 | LOR                  |                        | 5.69   | 0.924 | 3.8771     | 7.50       |
| 12 | Mo-17 derived        |                        | 8.59   | 0.860 | 6.9081     | 10.28      |
| 13 | PHI                  |                        | 5.11   | 1.051 | 3.0547     | 7.17       |
| 14 | RWS                  |                        | 8.61   | 1.049 | 6.5512     | 10.66      |
| 15 | A632.75/ B15-derived | Stiff Stalk            | 4.70   | 0.861 | 3.0118     | 6.39       |
| 16 | B73-derived          |                        | 6.09   | 0.869 | 4.3879     | 7.80       |
| 17 | LH82-derived         |                        | 4.02   | 0.856 | 2.3425     | 5.70       |
| 18 | LOR                  |                        | 4.66   | 0.918 | 2.8626     | 6.46       |
| 19 | Mo17-derived         |                        | 7.40   | 0.858 | 5.7195     | 9.08       |
| 20 | PHI                  |                        | 3.62   | 1.068 | 1.5260     | 5.71       |
| 21 | RWS                  |                        | 9.26   | 1.062 | 7.1760     | 11.34      |
| 22 | A632.75/ B15-derived | Flint corn             | 3.45   | 0.898 | 1.6919     | 5.21       |
| 23 | B73-derived          |                        | 4.63   | 1.204 | 2.2665     | 6.99       |

|    |                      |            |      |       |         |      |
|----|----------------------|------------|------|-------|---------|------|
| 24 | LH82-derived         | Sweet Corn | 3.20 | 0.884 | 1.4659  | 4.93 |
| 25 | LOR                  |            | 3.47 | 1.000 | 1.5134  | 5.43 |
| 26 | Mo17-derived         |            | 4.65 | 0.894 | 2.9009  | 6.40 |
| 27 | PHI                  |            | 3.92 | 1.169 | 1.6307  | 6.21 |
| 28 | RWS                  |            | 4.90 | 1.112 | 2.7230  | 7.08 |
| 29 | A632.75/ B15-derived |            | 4.54 | 1.097 | 2.3907  | 6.69 |
| 30 | B73-derived          |            | 2.71 | 1.424 | -0.0788 | 5.50 |
| 31 | LH82-derived         |            | 5.52 | 1.104 | 3.3597  | 7.69 |
| 32 | LOR                  |            | 3.44 | 1.241 | 1.0043  | 5.87 |
| 33 | Mo17-derived         |            | 4.92 | 1.081 | 2.8019  | 7.04 |
| 34 | PHI                  |            | 5.51 | 1.446 | 2.6787  | 8.35 |
| 35 | RWS                  |            | 5.62 | 1.497 | 2.6832  | 8.55 |

**Table S3.** Pairwise comparisons of the inducer backgrounds within each donor background.

Donor background = *Commercial dent hybrid*:

| Inducer background  | emmean | SE    | df  | Asymp.<br>LCL | Asymp.<br>UCL | group |
|---------------------|--------|-------|-----|---------------|---------------|-------|
| RWS                 | 11.71  | 1.336 | Inf | 9.0912        | 14.33         | AB    |
| B73-derived         | 11.38  | 1.113 | Inf | 9.1979        | 13.56         | A     |
| Mo17-derived        | 10.10  | 1.058 | Inf | 8.0228        | 12.17         | ABC   |
| LOR                 | 9.92   | 1.142 | Inf | 7.6807        | 12.16         | ABC   |
| A632.75/B15-derived | 9.28   | 1.055 | Inf | 7.2134        | 11.35         | ABC   |
| LH82-derived        | 8.34   | 1.055 | Inf | 6.2666        | 10.40         | BC    |
| PHI                 | 6.92   | 1.360 | Inf | 4.2576        | 9.59          | C     |

Donor background = *Non-stiff stalk*

| Inducer background  | emmean | SE    | df  | Asymp.<br>LCL | Asymp.<br>UCL | group |
|---------------------|--------|-------|-----|---------------|---------------|-------|
| RWS                 | 8.61   | 1.049 | Inf | 6.5512        | 10.66         | AB    |
| Mo17-derived        | 8.59   | 0.860 | Inf | 6.9081        | 10.28         | A     |
| B73-derived         | 7.85   | 0.920 | Inf | 6.0436        | 9.65          | ABC   |
| A632.75/B15-derived | 7.23   | 0.856 | Inf | 5.5535        | 8.91          | ABC   |
| LH82-derived        | 6.31   | 0.853 | Inf | 4.6328        | 7.98          | BC    |
| LOR                 | 5.69   | 0.924 | Inf | 3.8771        | 7.50          | C     |
| PHI                 | 5.11   | 1.051 | Inf | 3.0547        | 7.17          | C     |

Donor background = *Stiff stalk*:

| Inducer background  | emmean | SE    | df  | Asymp.<br>LCL | Asymp.<br>UCL | group |
|---------------------|--------|-------|-----|---------------|---------------|-------|
| RWS                 | 9.26   | 1.062 | Inf | 7.1760        | 11.34         | A     |
| Mo17-derived        | 7.40   | 0.858 | Inf | 5.7195        | 9.08          | AB    |
| B73-derived         | 6.09   | 0.869 | Inf | 4.3879        | 7.80          | BC    |
| A632.75/B15-derived | 4.70   | 0.861 | Inf | 3.0118        | 6.39          | CD    |
| LOR                 | 4.66   | 0.918 | Inf | 2.8626        | 6.46          | CD    |
| LH82-derived        | 4.02   | 0.856 | Inf | 2.3425        | 5.70          | D     |
| PHI                 | 3.62   | 1.068 | Inf | 1.5260        | 5.71          | CD    |

Donor background = *Flint Corn*

| Inducer background | emmean | SE    | df  | Asymp.<br>LCL | Asymp.<br>UCL | group |
|--------------------|--------|-------|-----|---------------|---------------|-------|
| RWS                | 4.90   | 1.112 | Inf | 2.7230        | 7.08          | A     |
| Mo17-derived       | 4.65   | 0.894 | Inf | 2.9009        | 6.40          | A     |

|                     |      |       |     |        |      |   |
|---------------------|------|-------|-----|--------|------|---|
| B73-derived         | 4.63 | 1.204 | Inf | 2.5665 | 6.99 | A |
| PHI                 | 3.92 | 1.169 | Inf | 1.6307 | 6.21 | A |
| LOR                 | 3.47 | 1.000 | Inf | 1.5134 | 5.43 | A |
| A632.75/B15-derived | 3.45 | 0.989 | Inf | 1.6919 | 5.21 | A |
| LH82-derived        | 3.20 | 0.884 | Inf | 1.4659 | 4.93 | A |

Donor background = *Sweet Corn*:

| Inducer background  | emmean | SE    | df  | Asymp.<br>LCL | Asymp.<br>UCL | group |
|---------------------|--------|-------|-----|---------------|---------------|-------|
| RWS                 | 5.62   | 1.497 | Inf | 2.6832        | 8.55          | A     |
| LH82-derived        | 5.52   | 1.104 | Inf | 3.3597        | 7.69          | A     |
| PHI                 | 5.51   | 1.446 | Inf | 2.6787        | 8.35          | A     |
| Mo17-derived        | 4.92   | 1.081 | Inf | 2.8019        | 7.04          | A     |
| A632.75/B15-derived | 4.54   | 1.097 | Inf | 2.3907        | 6.69          | A     |
| LOR                 | 3.44   | 1.241 | Inf | 1.0043        | 5.87          | A     |
| B73-derived         | 2.71   | 2.424 | Inf | -0.0788       | 5.50          | A     |
